# Supplementary material for: Identification of a lipid scrambling domain in ANO6/TMEM16F
Source: eLife journal article supplement (doi:10.7554/elife.06901), 2015-06-09
Supplement: supp [file elife_poa_e06901_Figure_6_figure_supplement_1.pdf › elife_poa_e06901_Figure_6_figure_supplement_1.pdf]

|                           | ANO1         | ANO6         |
|---------------------------|--------------|--------------|
| Ochotona princeps         | XP_004598328 | XP_004597939 |
| Mus musculus              | XP_006508516 | XP_006520292 |
| Sorex araneus             | XP_004618642 | XP_004617125 |
| Myotis brandtii           | XP_005864562 | XP_005881770 |
| Rattus norvegicus         | XP_006230838 | XP_006242346 |
| Cavia porcellus           | XP_003468174 | XP_003476132 |
| Chinchilla lanigera       | XP_005384296 | XP_005406650 |
| Octodon degus             | XP_004627166 | XP_004638701 |
| Loxodonta africana        | XP_003422667 | XP_003405435 |
| Otolemur garnettii        | XP_003798337 | XP_003793601 |
| Homo sapiens              | NP_060513    | XP_005268763 |
| Pan troglodytes           | XP_003313240 | XP_003313797 |
| Tupaia chinensis          | XP_006171411 | XP_006168620 |
| Camelus ferus             | XP_006174720 | XP_006190384 |
| Mustela putorius furo     | XP_004808701 | XP_004808033 |
| Canis lupus familiaris    | XP_854489    | XP_005637010 |
| Orcinus orca              | XP_004278099 | XP_004274476 |
| Ceratotherium simum simum | XP_004441181 | XP_004428978 |
| Pantholops hodgsonii      | XP_005963680 | XP_005963792 |
| Capra hircus              | XP_005700109 | XP_005680114 |
| Ovis aries                | XP_004019998 | XP_004007487 |
| Bos taurus                | NP_001179646 | XP_002687401 |
| Bos mutus                 | XP_005908980 | XP_005902421 |
