# Supplementary material for: Identification of a lipid scrambling domain in ANO6/TMEM16F
Source: eLife journal article supplement (doi:10.7554/elife.06901), 2015-06-09
Supplement: supp [file elife_poa_e06901_Figure_6_figure_supplement_2.pdf › elife_poa_e06901_Figure_6_figure_supplement_2.pdf]

ANO1\_MOUSE MRVPEKYSTL PAEDRSVHIV NICAIEDLGYPSEGLTLLNS LSDPDAECK YGLYFRDGKR KVDYILVYHH KRASGSRILA 80  
ANO6\_MOUSE -----M QMMTHKV-LL NMELEEDDD- -EDGDIVLE NFDQTIVCPT FGSLENQQDF RTPEFEEFNG KPDLLFFIDG 67

ANO1\_MOUSE RGLQNDML GTRVRQDQP LPGKQSPVDA GSPEVPMDYH EDDKRFRREE YEGNLEAGS EENDEDTKI HGVGVVKIHA 160  
ANO6\_MOUSE QRRIDFILY EDES KKENNK ---KGT- -N EKQKR-KRQA YESNLICHG QLEATRSVSD DKLVRVKVHA 130

ANO1\_MOUSE PWHVLCREAE FLKLLKMTKK VYHISETRGL LKTINSVLQK ITDPIQPKVA EHRPQTTKRL SYPSREKQH LFDLTDRDSF 240  
ANO6\_MOUSE PWEVLCITYAE IMHILKRLKLP --NDLKRTRSP FGNLW--- FTKVLRVNS VIKREQ-EFF TAPLEKSRMN DRYILDRDSF 203

ANO1\_MOUSE EDSKTRSTIV YEILKRTT- CTKAKYSMGI TSLLANGVYS AAYPLHDG- - DYE GDNVEF- NDKLLVEEW ASYGVFYKYQ 315  
ANO6\_MOUSE ENPATRSRIV YFLLSHVKYQ VMNVNKFGL NR LVSSGIYK AAFPLHDCRF NYSEDISCP SEYLYLREW AHPRS IYKKG 283

ANO1\_MOUSE RIDVVKYFGE EKVELYFAWL GAYTQMLIPA SIVGVIVFLY GCATVDENIP SMEMCDQRYN --TMCGLGD KTSYHKMSS 393  
ANO6\_MOUSE PLDLIRKVFGE EKILYFAWL GYVYQMLLLA AVVGVACFLY GYLDDNCTW SKEVCDPDIG GQILLMCRQGD RLCPFWRLNI 363

ANO1\_MOUSE AATARASHL FDNPAIVFIS VFMALWAATF MEHWKRKQMR LNYRWDLTGF EEEEEAVKDH PRAVEEA- - -RVLEKSLR 468  
ANO6\_MOUSE TESSKKLCI EDSFGILFIS VFMGVWVTLF LEFWKRROAE LEYEWDTVEL QEEQAR- - -EVEAQCN HVVINIITQE 438

ANO1\_MOUSE KESRNKEIDK VKLTWRDRFP AYETNLVSII FMIATVFAIV LGVIIYRIST AAALAMNSD SVRS-NIRVT VTATAVINIL 547  
ANO6\_MOUSE ERIPFTICG KCIRVTLCAS AVFWILLII ASVIGIIVYR LSVFIVFSTI LPKNPNGTD IQKYLTPQMA TSITASIIISF 518

ANO1\_MOUSE VVILDEVY GCIARWLTKI EYPKTEKSE ERCTFKAFLL KFNVS YTPIF YVAFKKGRFV GRPGDYVYIF RSFRMEBCAF 627  
ANO6\_MOUSE IIMIINTIY EKVAIMITNF ELRRTQTDEY NSLTMKMFLL QFVNY YSSCF YIAFFKCKFV GYPGDPVYLL GKYRSEECDF 598

ANO1\_MOUSE GGCIMELCIQ USIIMLGKQL IQNNLFEIGI PKMKKFIRYL KLRRQSPSDR EEEYVKRKQRY EVDNLEPFA GLTPEYMEMI 707  
ANO6\_MOUSE GGCLELTTO LTIIIMGKA- IWNIIQEVLL PWVMNLIG- RYKRVS GSEK - -ITPRWEQ DYHLQPMGKL GLFYEYLEMI 672

ANO1\_MOUSE IQEGEVTLFV ASFPLAFLFA LLNNHIEIRL DAKKFVTEL RPVIRAKDI GIWYNILRVS GKAVIINAF VISHTSDFLP 787  
ANO6\_MOUSE IQEGEVTLFV ASFPLAFLA LVNNHIEIRV DAWKLTQFR RMVPEKAQDI GAWQPIMQSI AILAVVTNMF IIAHTSDMIP 752

ANO1\_MOUSE RLVVLYMY- - - - -QNGT MHGFVNH TLS SFNVSD FQNG TAPNDPLD LG YEVQICRYKD YREDFWSEHK YDISKDFWAV 860  
ANO6\_MOUSE RLVVYWSFI PPGDHTYYI MDGYINNTLS VENITDEKNT DKENPYIGLG -NYTLCRYD FANPDGHPQE YKHNIYYVHV 831

ANO1\_MOUSE LAARIAVIV FQNLVFMFS D FVDWVLPDIP KDISQQLHKE KVLMLVELFMR EEQGGQQLLD TWMEKIKPRD VPCNNHSPTT 940  
ANO6\_MOUSE IAAKIAIIV MEHIYSVKF EISYALPDVS KITSKLIKRE KYLTQKL-LH ESHLKDLTKN MGIIAARIGG TVDINSVRPKL 910

ANO1\_MOUSE HPEAGDGSPV PSYEHG DAL 960  
ANO6\_MOUSE E----- 911
