# Supplementary material for: Identification of a lipid scrambling domain in ANO6/TMEM16F
Source: eLife journal article supplement (doi:10.7554/elife.06901), 2015-06-09
Supplement: supp [file elife_poa_e06901_Figure_6_figure_supplement_3.pdf › elife_poa_e06901_Figure_6_figure_supplement_3.pdf]

| mANO1(ac)<br>(960aa) | mANO6 (insert) | $I_{+100mV}$<br>$20\mu M Ca^{2+}$ | N | $I_{+200mV}$<br>Zero $Ca^{2+}$ | N | PLS<br>(% positive cells) |
|----------------------|----------------|-----------------------------------|---|--------------------------------|---|---------------------------|
| P380-E445            | P350-Q415      | 0.16                              | 4 | <0.1                           | 3 | 2                         |
| D485-Y514            | G448-Y447      | 0.51                              | 4 | <0.1                           | 3 | 2                         |
| T518-N546            | V481-S517      | 1.19                              | 2 | <0.1                           | 3 | 5                         |
| S532-G558            | G495-E529      | 4.75                              | 6 | 0.255                          | 7 | 85                        |
| C559-V569            | K530-L541      | 8.3                               | 5 | 0.301                          | 5 | 65                        |
| C559-F584            | K530-F556      | 6.11                              | 6 | 0.201                          | 6 | 70                        |
| D554-E555            | N525-T526      | 10.7                              | 3 | 1.64                           | 6 | 8                         |
| D554-K588            | N525-Q559      | 2.21                              | 6 | 4.7                            | 6 | 90                        |
| P570-A600            | P541-A571      | 0.45                              | 5 | 0.10                           | 4 | 3                         |
| E573-I596            | Q544-C567      | 0.22                              | 3 | 0.075                          | 3 | 7                         |
| I636-F663            | T608-L633      | 0.31                              | 5 | 0.776                          | 5 | 3                         |
| Q653-F663            | F623-L633      | 4.5                               | 4 | 0.209                          | 4 | 3                         |
| R618-F663            | G589-L633      | 0.05                              | 4 | 0.222                          | 3 | 5                         |
| P658-P701            | P628-Y665      | 1.81                              | 3 |                                |   | 7                         |
| R748-P787            | R713-P752      | 6.11                              | 3 | 0.255                          | 7 | 3                         |
| Y851-M909            | Y822-L879      | 2.38                              | 3 |                                |   | 4                         |
| WT-ANO1              |                | 8.97                              | 3 | 0.45                           | 6 | 5                         |
