# Supplementary material for: Identification of a lipid scrambling domain in ANO6/TMEM16F
Source: eLife journal article supplement (doi:10.7554/elife.06901), 2015-06-09
Supplement: supp [file elife_poa_e06901_Figure_6_figure_supplement_4.pdf › elife_poa_e06901_Figure_6_figure_supplement_4.pdf]

| <b>ANO1</b> | <b>Replaced with ANO6</b> | <b>PLS<br/>(%positive cells)</b> |
|-------------|---------------------------|----------------------------------|
| D554-E555   | N530-T531                 | 4                                |
| D554-V556   | N525-I527                 | 3                                |
| G558-I560   | E529-V531                 | 7                                |
| R562-L564   | I533-I535                 | 5                                |
| K566-I567   | N537-F538                 | 5                                |
