# Supplementary material for: Identification of a lipid scrambling domain in ANO6/TMEM16F
Source: eLife journal article supplement (doi:10.7554/elife.06901), 2015-06-09
Supplement: supp [file elife_poa_e06901_Figure_6_figure_supplement_5.pdf › elife_poa_e06901_Figure_6_figure_supplement_5.pdf]

| <b>ANO6</b> | <b>Replaced with ANO1</b> | <b>PLS<br/>(% positive cells)</b> | <b>Currents<br/>(pA at 100 mV)</b> |
|-------------|---------------------------|-----------------------------------|------------------------------------|
| N525-T526   | D554-E555                 | 12                                |                                    |
| N525-I527   | D554-V556                 | 15                                | 54 ± 24                            |
| E529-V531   | G558-I560                 | 7                                 | 77 ± 41                            |
| I533-I535   | R562-L564                 | 15                                |                                    |
| N537-F538   | K566-I567                 | 78                                |                                    |
| N525-Q559   | D554-K588                 | 5                                 | 71 ± 43                            |
| P541-L662   | P570-A697                 | 7                                 | 65 ± 50                            |
