# Supplementary figures and images for: Identification of a lipid scrambling domain in ANO6/TMEM16F
Source: eLife journal article supplement (doi:10.7554/elife.06901), 2015-06-09

**A** 1-6-1\_D554-K588  
EGFP Annexin-V >

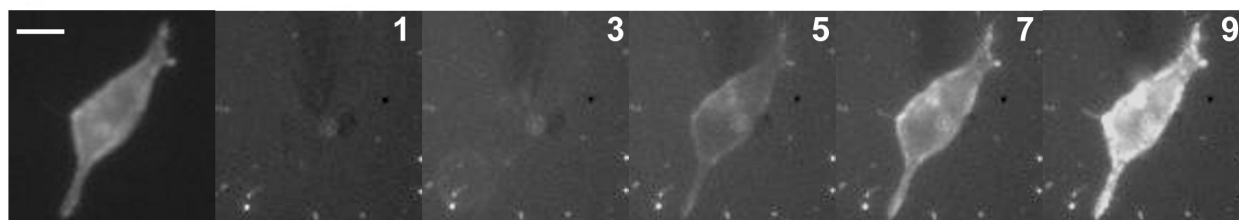

**B** 6-1-6\_(N525-I527)  
EGFP Annexin-V >

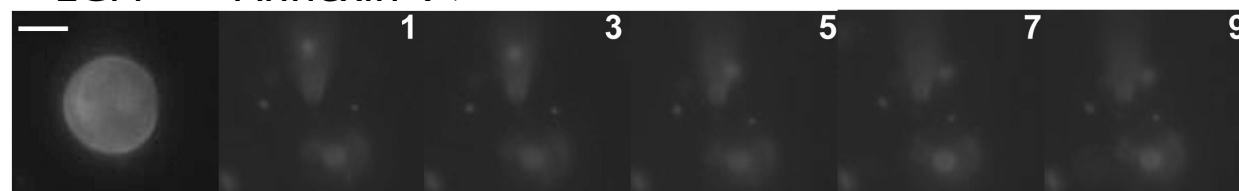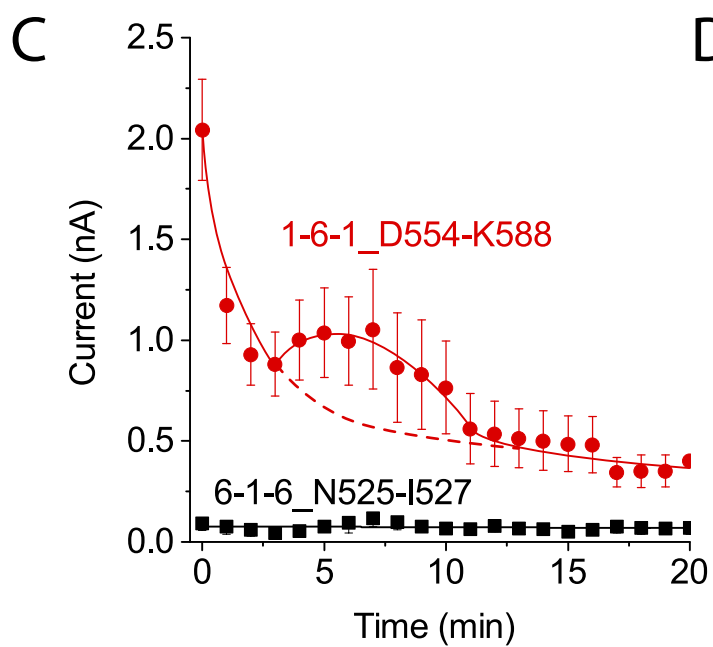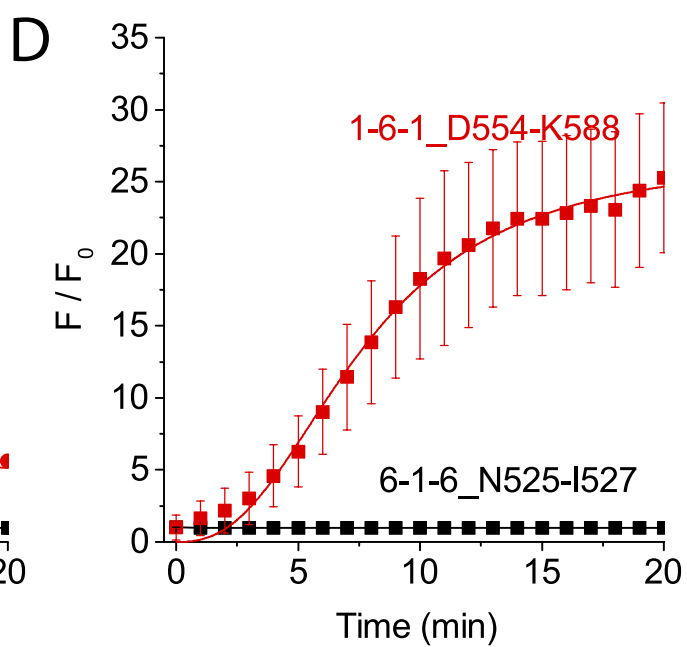

Supplement: supp [file elife_poa_e06901_Figure_7_figure_supplement_1.pdf › elife_poa_e06901_Figure_7_figure_supplement_1.pdf]
